# Supplementary material
Source: Springer Nature journal article supplement (https://www.springermedizin.de/resource/supplementary/12943_2007_369_MOESM3_ESM.pdf/9554030)

untreated

rAd/GFP 500

rAd/dnStat3 100

rAd/dnStat3 250

rAd/dnStat3 500

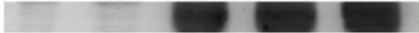

— FLAG

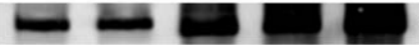

— Stat3

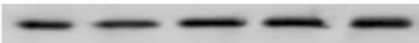

— GAPDH

WVH

Supplement: MOESM3 [file 9554030]
